# Supplementary material for: Changes in carbon stocks of &lt;i&gt;Fagus&lt;/i&gt; forest ecosystems along an altitudinal gradient on Mt. Fanjingshan in Southwest China
Source: Copernicus journal article supplement (doi:10.5194/bg-2018-242), 2018-06-07
Supplement: Supplementary file [file bg-2018-242-AC2-supplement.pdf]

1 Authors' response to reviewers' comments on the manuscript bg-2018-242 "Changes in carbon  
2 stocks of *Fagus* forest ecosystems along an altitudinal gradient on Mt. Fanjingshan in  
3 Southwest China" by Qiong Cai et al.

4  
5 **To the editor:**

6  
7 Dear Dr. Frank Hagedorn,

8  
9 Thank you very much for your treatment of the manuscript and the insightful suggestions from  
10 the two reviewers. These comments were replied focusing on several primary points: (1)  
11 explaining the reasonability of the experimental design and statistical analyses, (2) discussing  
12 the possible effects of management or disturbance, (3) proving the reasonability of stand age  
13 estimation, (4) exploring the possible impacts of soil properties and tree density, (5) updating  
14 the allometric equations for shrubs.

15  
16 We have carefully addressed these comments in the revised manuscript. Please find our point-  
17 to-point responses to these comments as attached at the bottom of this letter.

18  
19 We are looking forward to receiving your decision.

20  
21 Best wishes,

22  
23 Chengjun Ji

24 Department of Ecology

25 Peking University, Beijing 100871, China

26 Tel: +86-10-6276 5578, Fax: +86-10-6275 6560

27 E-mail: jicj@ pku.edu.cn

28  
29

30 **To Anonymous Referee #1:**

31 **[Comment] General comments**

32 The paper is overall well written with the exception of some confused references to Tables and  
33 Figures. It is within the scope of BG addressing the question of drivers of forest ecosystem C  
34 stock changes. The C stocks estimates in living biomass, dead wood, litter and soil along the  
35 transect were based on thorough and comprehensive vegetation and soil sampling and analysis.  
36 To place the findings in the context of similar Fagus Ecosystem worldwide, a collection of  
37 published data was used. Beyond the estimation of C stocks along the transect, the paper  
38 presents no novel methods or insights in mechanisms to explain observed pattern, it can confirm  
39 existing knowledge. Given the large range of C storage in different C pools in the examined  
40 system and also in the systems used for comparison, the value of the comparison with other  
41 studies is limited. In the comparison it may have been interesting to focus and expand on  
42 differences and their causes, e.g. regarding the contribution of litter and dead wood. The roles  
43 of forest management and use intensity were only moderately addressed, particularly in the  
44 comparison with other forests. It may also have been valuable to place the results in the context  
45 of the National Forest Resource Inventory database, cf. Fang J, Chen A, Peng C, Zhao S, Ci L  
46 (2001) Changes in Forest Biomass Carbon Storage in China Between 1949 and 1998 Science  
47 292:2320-2322 doi:10.1126/science.1058629.

48 **[Reply]** Thank you for your insightful comments. Firstly, we are sorry for the confusion caused  
49 by the errors in citation the tables and figures. Such mistakes have been avoided in the revised  
50 manuscript.

51 The main purpose of this paper was to provide basic and comprehensive data of the C  
52 pools of *Fagus* (beech) forests on Mt. Fanjingshan, a place quite unique and ideal for studies  
53 of Chinese beech forests as it has the widest elevational range of Chinese beech forests at a  
54 local scale of any region. There have been few reports about the C storage of beech forests in  
55 China, compared to other regions (Mund, 2004; Poivesan et al., 2005; Takadi, 1969; Martin and  
56 Bailey, 1999; Jenkins et al., 2001). Additionally, the elevation transect provided an excellent  
57 environmental gradient to explore the responses of beech forests to varied environmental  
58 conditions at a local scale (Körner, 2007).

59 And we summarized the following three points to reply to your main comments and  
60 suggestions.

61 **1) Comparison with beech forests in other regions**

62 The comparison of beech forests in different regions was aimed to give a glimpse at the C  
63 storage of beech forests on Mt. Fanjingshan at a local scale. To make the comparison more  
64 reasonable, we have confined the range of stand age, thus only beech forests within 30–215  
65 year were included [Line 162-163; Table S3]. In the comparison, quantitative analyses of the  
66 impacts of management or disturbance were not conducted, considering the limited  
67 experimental data and lack of exact documents of disturbance in some sites, despite their  
68 significant impacts on C storage of forest ecosystems (Mund, 2004; Mund and Schulze, 2006).  
69 Hopefully, it will be discussed in further studies.

70

71 **2) The contribution of woody debris and litter**

72 We have pointed out that the contribution of plant debris in beech forests on Mt.  
73 Fanjingshan (< 4%) was comparable to that of forests in China on the whole, while it was

74 relatively lower than that in some temperate forests in other regions of the world (8–47%),  
75 possibly because of the differences in stand age and disturbance history (Zhu et al., 2017a). For  
76 example, the studies in other countries might include stands that were very old (e.g., Spies and  
77 Franklin, 1988) or had suffered catastrophic disturbances (Nalder and Wein, 1999) [Line 264-  
78 268].

### 80 **3) Impacts of management or human disturbance**

81 The impacts of management or human disturbance on the elevational patterns of woody  
82 debris were further discussed in the Discussion section in the revised manuscript. And we  
83 supposed that the elevational patterns of woody debris C storage might be shaped by stand age,  
84 disturbance and climate together. [Line 312-323: ‘However, it is noteworthy that the C storages  
85 of woody debris in several old forests were extremely low (Figure 2c), especially at 1580 m  
86 (0.2 Mg C ha<sup>-1</sup>), possibly caused by human disturbance as the plot was not far from a rest  
87 platform for the tourists. With this plot excluded (1580 m), the C storage of woody debris was  
88 positively related to MAP ( $R^2 = 0.66$ ,  $P = 0.01$ ) and vegetation C storage ( $R^2 = 0.68$ ,  $P = 0.01$ ).  
89 Stand age also had a slight positive impact on it despite not statistically significant ( $R^2 = 0.39$ ,  
90  $P = 0.1$ ). The amount of woody debris in the two post-fire young beech forests on Mt.  
91 Fanjingshan was quite low, probably because there was little residual woody debris of the  
92 previous stands. Besides, the two regenerating stands were young thus had shorter time of  
93 accumulation of woody debris. With the increase of elevation, stands tended to be older with  
94 more larger trees, resulting in more tree mortality (the self-thinning process) thus increased  
95 input of woody debris (Sturtevant et al., 1997), except for the quite low stands (1580 m)  
96 possibly disturbed by management activities (collect or removal of woody debris)’].

97 For the patterns of vegetation and soil, we supposed they were more related to disturbance  
98 or management in the past. As in recent decades, beech forests on Mt. Fanjingshan have seldom  
99 been disturbed by human management activities such as selection or clear cutting, which were  
100 not permitted in the National Natural Reserves. And to some extent, stand age was also an  
101 indicator of past human disturbances (Bradford et al., 2008). Besides, we have also discussed  
102 the possible impacts of past disturbance on the C storage of soil [Line 346-352: ‘The  
103 comparatively high soil C storage at the lower two young plots, especially that at 1136 m ( $229.7$   
104  $\pm 81.3$  Mg C ha<sup>-1</sup>) was noteworthy, which was probably related to the previous land use and  
105 disturbance of the beech forests. As abovementioned, the lower two beech forests were post-  
106 fire secondary forests, which might have accumulated large quantities of C in soil before the  
107 dramatic disturbance (Paul et al., 2002; Nave et al., 2010). In addition, plots at lower elevations  
108 generally suffered more from human disturbance (Zhang et al., 2009; Alves et al., 2010).’].

### 109 **Specific comments / technical corrections**

110  
111  
112 **[Comment] 1.** Abstract, 1.22: Rephrase; the wording is too general. The study presents reliable  
113 data on C storage as one among many ecosystem functions but not for understanding structure  
114 and function of Chinese beech forests.

115 **[Reply]** Thank you for your suggestion. We have rephrased the expression as following: ‘The  
116 present study provides reliable data for understanding the C storage of Chinese beech forests  
117 and their possible roles in regional C cycling’ [Lines 22-23].

118

119 **[Comment] 2.** 1.29-30: The summary for policy-makers in IPCC 2013 is not an appropriate  
120 reference here. Technically, there are 5 pools since vegetation is separated into above- and  
121 below-ground parts. Consider revising the sentence and citing IPCC (2006) 2006 IPCC  
122 Guidelines for National Greenhouse Gas Inventories Volume 4 Agriculture, Forestry and Other  
123 Land Use. Available at: <http://www.ipccnggip.iges.or.jp/public/2006gl/vol4.html>.

124 **[Reply]** Thanks. We have revised it according to your suggestion [Lines 29-30: ‘There are  
125 different components of C stock in a natural forest ecosystem: vegetation (including  
126 aboveground and belowground biomass), woody debris, litter, and soil (IPCC, 2006)’].

127

128 **[Comment] 1.33:** Delete ‘even’.

129 **[Reply]** We have deleted it.

130

131 **[Comment] 3.** 1.45 and throughout the manuscript: altitudinal, altitude etc. Consider replacing  
132 with elevation, which is more appropriate term in this context; cf. McVicar T, Körner C (2013)  
133 On the use of elevation, altitude, and height in the ecological and climatological literature  
134 *Oecologia* 171:335-337 doi:10.1007/s00442-012-2416-7

135 **[Reply]** Thank you for your suggestion. Throughout the revised manuscript, ‘altitude’ and  
136 ‘altitudinal’ have been replaced by ‘elevation’ or ‘elevational’ (McVicar and Körner, 2013).

137

138 **[Comment] 4.** 1.50-51: grammar – ‘there has been ...pattern’ or ‘there have been...patterns’.

139 **[Reply]** Thanks. We have revised it as ‘there have been no consistent elevational patterns’ [Line  
140 51].

141

142 **[Comment] 5.** 1.56: Consider revising: ‘less C accumulation in total’ since in relative terms  
143 younger stands tend to accumulate more carbon’. Also, biomass accumulation is likely to peak  
144 in a mature forest before declining again; cf. Pregitzer and Euskirchen 2004 cited in the  
145 manuscript.

146 **[Reply]** Thanks. We have revised it as you suggested [Line 57].

147

148 **[Comment] 6.** 1.64: Does ‘unneglectable’ exist, maybe revise to ‘negligible’ or ‘insignificant’

149 **[Reply]** We have revised it to ‘significant’ [Line 64].

150

151 **[Comment] 7.** 1.90: Is ‘consecutive’ appropriate; consider ‘continuous’.

152 **[Reply]** Thanks. We have changed it to ‘continuous’ [Line 73, 90].

153

154 **[Comment] 8.** 1.149: It would have been interesting to give some indication on the variability  
155 of stand age to demonstrate how appropriate this estimate is for the primary and possibly  
156 uneven-aged forests. Or possibly a description of the presence/absence of different age cohorts.

157 **[Reply]** Thanks for your suggestion. Uneven-aged, mixed forests have been reported to account  
158 for more than 90% of the forest area worldwide (Dixon, 1994; Bradford et al., 2008). To  
159 estimate the stand age of such kinds of forests, two ways are commonly used: the observed tree  
160 age or time since disturbance (Bradford et al., 2008). Due to lack of history documents, it is  
161 usually difficult to know exactly the disturbance history of the stands especially for old forests.

162 For the former method, there are also different selections: the maximum age of the largest trees  
 163 (Bradford et al., 2008), the average age of the largest 3-5 trees (Bradford et al., 2008), or the  
 164 age of the fifth largest tree (Bruelheide et al., 2011; Zhu et al., 2017a). Such selections are all  
 165 based on the assumption that DBH accumulated with time.

166 The DBH-age relationship of the *Fagus* trees on Mt. Fanjingshan was plotted based on the  
 167 sampled tree cores. On local scale, trees with larger DBH tended to be older ( $R^2 = 0.77$ ,  $P <$   
 168  $0.001$ ; Figure 5a). Positive patterns also existed in most of the plots, and some insignificant  
 169 relationship (plots at 1735m) might be due to the limited numbers of sampled trees (Table R1).  
 170 In the present study, the age of the fifth largest beech tree was used to stand for the stand age,  
 171 and it has been proved to be an excellent indicator of the successional stages of the forests  
 172 (Bruelheide et al., 2011).

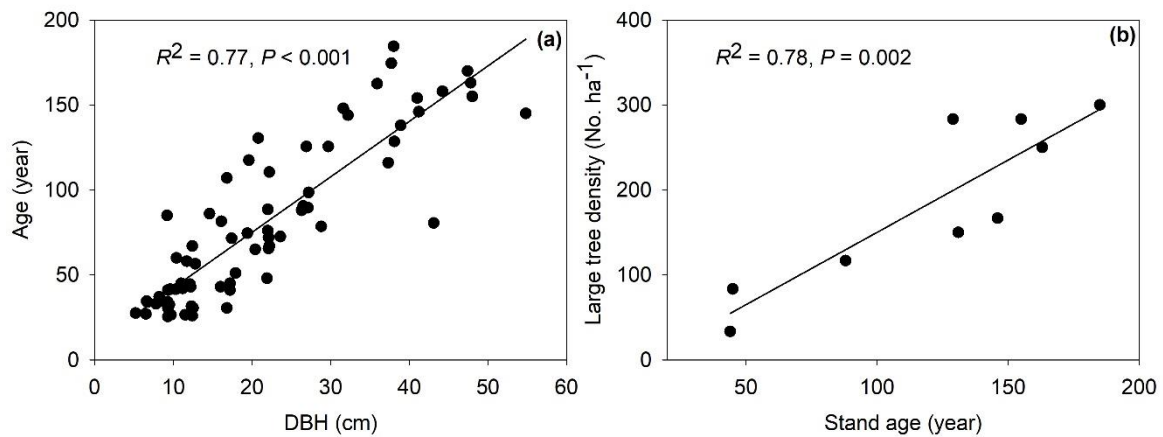

173  
 174 **Figure 5.** The relationships between (a) diameter at breast height (DBH) and age of the beech  
 175 trees, (b) large tree (DBH  $\geq$  30 cm) density and stand age.

176  
 177 **Table R1** Summary of relationships between DBH and age of beech trees in each plot on Mt.  
 178 Fanjingshan.

| Elevation (m) | $R^2$ | $F$ value | $P$ value | N  |
|---------------|-------|-----------|-----------|----|
| 1095          | 0.66  | 15.73     | 0.004     | 10 |
| 1136          | 0.52  | 8.659     | 0.019     | 10 |
| 1221          | 0.38  | 4.287     | 0.077     | 10 |
| 1401          | 0.84  | 36.27     | 0.001     | 10 |
| 1500          | 0.98  | 217.3     | 0.000     | 7  |
| 1580          | 0.55  | 4.842     | 0.093     | 6  |
| 1735          | 0.52  | 4.398     | 0.104     | 6  |
| 1843          | 0.91  | 59.97     | 0.000     | 8  |
| 1930          | 0.70  | 14.26     | 0.009     | 8  |

179 However, it has to be acknowledged that the estimation of stand age might have some  
 180 errors and possibly be underestimated. Because only beech trees were sampled considering  
 181 their dominant state. Besides, not all largest beech trees were cored due to some sampling  
 182 difficulties. Nevertheless, the stand age as estimated in the present study was significantly  
 183 positively correlated to the DBH of the fifth largest tree in each plot (linear regression:  $R^2 =$   
 184  $0.76$ ,  $P = 0.002$ ).

185

186 **[Comment] 9.** 1.160: The reference to Tab.2 is not clear in this context as it shows C cocks in  
187 the soil, which are not referred to in the preceding sentence, or in this chapter, which is about  
188 vegetation.

189 **[Reply]** We are sorry for the mistakes. In the revised manuscript, such confusions have been  
190 avoided.

191

192 **[Comment] 10.** 1.162, 166, Fig.1:  $R^2$  is presented which only tells how well the model is fitting  
193 the actual data. In addition, it would be valuable to state whether the coefficients are different  
194 from 0. This applies also to the results presented in sections 3.2 and 3.3.

195 **[Reply]** Thanks. The slopes of linear models are significantly different from 0 in our studies  
196 because *P* value of the slope is the same as that of the model in a general linear model (Figure  
197 2, 3 and 4 in the revised manuscript).

198

199 **[Comment] 11.** 1.181: Consider inserting 'total soil C storage'.

200 **[Reply]** Thanks. We have revised it [Lines 192-193].

201

202 **[Comment] 12.** 1.194, 195, 198, 201: The information is not in Tab. 2, possibly you are referring  
203 to Fig. 4?

204 **[Reply]** Thanks. We have revised the mistakes in the table and figure citation.

205

206

207 **[Comment] 13.** 1.204: Is worldwide really appropriate? The comparison of beech forests is  
208 based on European, Japanese and Chinese data. The American data are not mentioned in this  
209 section.

210 **[Reply]** Thanks for your comments. We have revised it as 'in other regions'. Actually, beech  
211 forests in America were also included, but the available data was quite few. Therefore, the data  
212 of America were not included in the table but they were listed in the notes after the table (Table  
213 4 in the revised manuscript).

214

215 **[Comment] 14.** 1. 208: Figure 3 was not previously introduced and is probably incorrectly cited  
216 here as Fig. 5 contains the relevant information.

217 **[Reply]** We are sorry for the confusion. This figure displayed the distribution of the beech  
218 forests on Mt. Fanjingshan and those used for comparison in other regions, thus we thought it  
219 make sense and still kept it in the revised manuscript (Figure 1).

220

221 **[Comment] 15.** 1.222-223: The discussion could be extended to the effect of different  
222 management practices and intensities of use. Many beech forests in Europe have been heavily  
223 used in the past and show legacies but are now often under some form of protection; cf. Mund  
224 M, Schulze E-D (2006) Impacts of forest management on the carbon budget of European beech  
225 (*Fagus sylvatica*) forests Allgem Forst- und Jagdzeitung 177:47-62 and also Mund 2004 cited  
226 in the manuscript.

227 **[Reply]** Thank you for your suggestion. As has been stated above, in the revised manuscript,  
228 the possible effects of forest management (removal of woody debris) on the age patterns of

229 woody debris was discussed (4.3 of the Discussion section) [Line 305-327]. For the patterns of  
230 vegetation and soil, we supposed they were more related to disturbance or management in the  
231 past. Please refer to the last two paragraphs in the reply to the special comments.

232

233 **[Comment] 16.** 1.234-236: Consider moving this to the results section.

234 **[Reply]** Thanks for your suggestion. We have moved the analysis to the Results section [Line  
235 215-228].

236

237 **[Comment] 17.** 1.246-249: Please clarify this sentence 'At the same time...lower output'. The  
238 study did not measure decomposition rate. What is the meaning of output, C emissions? This  
239 was not measured. Possibly rephrase to indicate that this is a hypothesis as, for example, on  
240 1.250-251.

241 **[Reply]** Thanks. The output here means the loss of plant debris, caused by decomposition and  
242 natural or human disturbances. We have rephrased the sentences in the revised manuscript [Line  
243 305-309, 329-336].

244

245 **[Comment] 18.** 1.247-248: Please clarify this sentence 'Herein, ...Input of plant debris'. It is  
246 not clear how increased C storage can result in in increased input of plant debris. Turnover of  
247 tree or shrub was not measured, and if it was the objective to discuss this aspect, a reference to  
248 literature such as Shaozhong Wang, Zhengquan Wang, Jiacun Gu 2017. Variation patterns of  
249 fine root biomass, production and turnover in Chinese forests. Journal of Forestry Research, 28:  
250 1185-1194 may be appropriate.

251 **[Reply]** Thanks. We have rephrased the sentences. Although biomass has been found to be  
252 positively correlated with the C storage of woody debris both on national (Zhu et al., 2017a)  
253 and local scales (Zhu et al., 2017b), one of the direct input of coarse woody debris is from tree  
254 mortality (Spies and Franklin, 1988). Actually, the amount of woody debris is generally  
255 determined by the timing of inputs, decomposition rate and the amount removed by natural or  
256 human disturbance (Harmon et al., 1986; Spies and Franklin, 1988). The inputs may be  
257 inherited from the previous stand after catastrophic disturbances, or recruit from tree mortality  
258 during the succession course (Spies and Franklin, 1988; Bond-Lamberty et al., 2002). And the  
259 latter tends to increase before the forest senescens (Sturtevant et al., 1997). Herein, with the  
260 increase of elevation, stands tended to be older with more large trees, resulting in more tree  
261 mortality (the self-thinning process) thus increased input of woody debris (Sturtevant et al.,  
262 1997) [Line 305-336].

263 The case may be somewhat different for litter. The amount of litter is mainly determined  
264 by the input of litter fall and the output through decomposition or disturbances (e.g., removal).  
265 Litter accumulation was found to be strongly related to canopy cover (Hall et al., 2006), while  
266 its relationships with biomass or stand age were not consistent in previous studies (Peichl and  
267 Arain, 2006; Zhu et al., 2017a, b). And the decomposition rate is generally faster than woody  
268 debris. Herein, the canopy cover had no obvious elevational patterns. Previous studies  
269 suggested that the relative faster decay rate of litter might enable it to reach a balance between  
270 the input and output more quickly (Zhu et al. 2017b). However, for more exact explanation, the  
271 data of litter fall and decomposition rate are required [Line 329-336].

272

273 **[Comment] 19.** 1.253: Fig. 2 does not include information on soil.

274 **[Reply]** We are sorry for the mistake and have revised it in the updated manuscript.

275

276 **[Comment] 20.** 1.264 & 182: The fact that the two secondary forests were disturbed by fire  
277 may explain the comparatively high soil C as there may be fire-derived carbon.

278 **[Reply]** We agree with you, and it has been stated in the manuscript as ‘the lower two beech  
279 forests were post-fire secondary forests, which might have accumulated large quantities of C in  
280 soil before the dramatic disturbance (Paul et al., 2002; Nave et al., 2010). In addition, plots at  
281 lower elevations generally suffered more from human disturbance (Zhang et al., 2009; Alves et  
282 al., 2010)’ [Line 349-352].

283

284 **[Comment] 21.** 1.265-267: The link between the first and second subclause is not clear. The  
285 reference Pregitzer and Euskirchen is not correct here, as they do not demonstrate a relationship  
286 between disturbance intensity and elevation.

287 **[Reply]** Thanks, we have rephrased the sentences [Line 352-355].

288

289 **[Comment] 22.** 1.267-268: ‘therefore’ is not appropriate as this it is a hypothesis.

290 **[Reply]** Thanks. We have deleted it.

291

292 **[Comment] 23.** 1.278-285: A further limitation is the uncertainty related to the application of  
293 allometric equations to estimate tree biomass. Standard deviations are presented for soil C in  
294 Tab. 2.

295 **[Reply]** Thank you for your insightful comments. We have addressed the possible limitation of  
296 using allometric equations in the Discussion section [Line 370-373: ‘Furthermore, the C storage  
297 of trees and shrubs were estimated using allocation equations as destructive sampling was  
298 forbidden. This could have resulted in some estimation errors despite careful selection, because  
299 the equations might be closely related to regions, forest types and species (Lima et al., 2012).’].

300

301 **[Comment] 24.** 1.297-298: It is not clear how the study contributes to the understanding of  
302 structure and function of beech forests in China. Rephrase to something like ‘C storage and  
303 distribution among pools’.

304 **[Reply]** Thanks. We have revised the expression as ‘understanding the C storage of Chinese  
305 beech forests and their possible roles in regional C cycling’ [Line 387].

306

307 **[Comment] 25.** Table 1: What is the explanation of the comparatively low age of 88 years of  
308 stand FJ4 relative to the other primary forests?

309 **[Reply]** The estimation of stand age might have some bias and possibly underestimation due to  
310 the difficulties in sampling the largest trees sometimes. However, the estimated stand age was  
311 positively related to the DBH of the 5th largest tree, which has been used to stand for the  
312 succession stage (Bruelheide et al., 2011). For more explanation, please refer to the response to  
313 Comment 8.

314

315 **[Comment] 26.** Table 2: Please indicate different meanings of the letters a and b, which are  
316 used to indicate significant differences.



317 **[Reply]** In the table (Table 3 in the revised manuscript), different letters indicate significant  
318 difference among soil layers in each column ( $P < 0.05$ ), as is generally adopted in the statistical  
319 analysis. Here, values marked with 'a' is significantly larger than that marked with 'b', that is  
320 to say, alphabetical letters indicate the values from large to small.

321

322 **[Comment] 27.** Tab. 3: The data for American beech forest are missing.

323 **[Reply]** The data for American beech forests are listed in the Note of Table 3 (Table 4 in the  
324 revised manuscript).

325

326 **[Comment] 28.** Figure 3: It appears that this figure is never referred to in the text; the reference  
327 to fig 3 on l.208 appears to refer to Fig. 5.

328 **[Reply]** Thanks. As we have addressed (reply to Comment 14), this figure (changed to Figure  
329 1 in the revised manuscript) displayed the distribution of the beech forests on Mt. Fanjingshan  
330 and those used for comparison in other regions. In the revised manuscript, it is cited in Line  
331 163.

332

333 **[Comment] 29.** Fig.4: Consider enlarging the figure or placing legend and coefficients  
334 differently.

335 **[Reply]** Thanks for your suggestion. The figure has been modified to make it more clear (Figure  
336 3 in the revised manuscript).

337

338 **[Comment] 30.** Table S2: What are the reasons and the effect of modifying the equations? How  
339 reasonable is it to use root: shoot ratios of trees for shrubs? This may not be appropriate, cf.  
340 Mooney HA (1972) The Carbon Balance of Plants Annual Review of Ecology and Systematics  
341 3:315-346, and should be discussed as limitation and source of error.

342 **[Reply]** Thank you for your valuable comments. In the former manuscript, the equations were  
343 modified based on the shrub samples we collected in the plots. However, the number of samples  
344 were limited thus it might result in some bias. Besides, it is true that the allocation strategies of  
345 different life forms might be distinct (Mooney, 1972). Therefore, we have recalculated the  
346 biomass of shrubs using new allocation equations which include both aboveground biomass  
347 (AGB) and belowground biomass (BGB) (Dong et al., 2002; Zhao, 2012; Tu et al., 2015; Xie  
348 et al., in press) (Table S2). Accordingly, the values of the C storage of vegetation and total  
349 ecosystem have also been updated in the revised manuscript. And the elevational trend of the  
350 shrub C storage was the same despite the absolute values varied a little. The new equations are  
351 listed in Table S2 as follows.

352 In the revised manuscript, the limitations of using allocation equations have also been  
353 addressed (Please see reply to Comment 23).

354

355 **Table S2.** Equations for calculating aboveground biomass (AGB, kg) and belowground  
 356 biomass (BGB, kg) of dominant shrub species used in this study. D, diameter at shoot base (cm);  
 357 H, height of a shrub (m); A, crown area of a shrub (m<sup>2</sup>); V, projected volume of a shrub (m<sup>3</sup>),  
 358  $V = AH$ .

| Species                         | Biomass equation                                                                                                                                                                                                    | Reference            |
|---------------------------------|---------------------------------------------------------------------------------------------------------------------------------------------------------------------------------------------------------------------|----------------------|
| <i>Ardisia</i>                  | AGB=0.004+0.137V+0.223V <sup>2</sup><br>BGB=0.001+0.122V+0.038V <sup>2</sup>                                                                                                                                        | Zhao, 2012           |
| <i>Castanopsis, Lithocarpus</i> | AGB=0.067(D <sup>2</sup> H) <sup>0.7039</sup><br>BGB=0.3446AGB <sup>0.7871</sup>                                                                                                                                    | Xie et al., in press |
| <i>Cyclobalanopsis, Fagus</i>   | AGB=0.0603+0.0274 D <sup>2</sup> H<br>BGB=0.3866AGB <sup>0.753</sup>                                                                                                                                                | Xie et al., in press |
| Ericaceae                       | AGB=0.0494(D <sup>2</sup> H) <sup>0.7627</sup><br>BGB=0.5483AGB <sup>0.8124</sup>                                                                                                                                   | Xie et al., in press |
| Rosaceae                        | AGB=0.0602(D <sup>2</sup> H) <sup>0.5989</sup><br>BGB=0.1879AGB <sup>0.7329</sup>                                                                                                                                   | Xie et al., in press |
| <i>Rubus</i>                    | AGB=0.0362(D <sup>2</sup> H) <sup>0.7555</sup><br>BGB=0.1096AGB <sup>0.672</sup>                                                                                                                                    | Xie et al., in press |
| Theaceae                        | AGB=0.0613(D <sup>2</sup> H) <sup>0.7102</sup><br>BGB=0.4014AGB <sup>0.47451</sup>                                                                                                                                  | Xie et al., in press |
| <i>Yushania brevipaniculata</i> | AGB=(132.92D1.36+32.7768D-8.1026+6.6254 D <sup>2</sup> H)/1000<br>BGB=(10.5903(D <sup>2</sup> H) <sup>0.5207</sup> +57.2177(D <sup>2</sup> H) <sup>0.2676</sup> +21.0077(D <sup>2</sup> H) <sup>0.4024</sup> )/1000 | Dong et al., 2002    |
| Liana                           | AGB=0.0581(D <sup>2</sup> H) <sup>0.9384</sup><br>BGB=0.0292(D <sup>2</sup> H) <sup>0.7569</sup>                                                                                                                    | Xie et al., in press |
| Other species                   | AGB=(35.4+0.0419(DH) +0.00203(DH) <sup>2</sup> -0.00000108(DH) <sup>3</sup> -BGB)/1000<br>-BGB<br>BGB=(9.64+0.0703(DH)+0.000546(DH) <sup>2</sup> -0.000000296(DH) <sup>3</sup> )/1000                               | Tu et al., 2015      |

360 **To Anonymous Referee #2**

361

362 **[Comment]** The manuscript could a contribution of interest for Biogeosciences and in principle  
363 within its specific scope but it is not suitable for publication in this form. The Authors have  
364 made a great effort in collecting many data, but the experimental design is not appropriate to  
365 the proposed objectives. In addition, statistical analysis of data is poor and misused because the  
366 statistical results do not confirm what the Authors reported as main findings. The Authors have  
367 completely neglected spatial variability in both soil and forest cover. Organic carbon content in  
368 soils is strongly dependent on the soil properties and particularly, on soil texture. The Authors  
369 should provide at least the main soil properties of the nine areas to show their homogeneity.  
370 Such an implicit assumption of homogeneity cannot hold with no information on soil properties.  
371 The nine stands are not comparable because they have different ages (ranging between 44 and  
372 185 years), density (ranging between 1483 and 2350 stems/ha). How do the Authors think  
373 possible to evaluate the key driving factors of altitude gradient in vegetation carbon storage?  
374 To separate the elevation effect from other attributes, it is requested to have homogeneous  
375 stands in which the only variable factor is elevation.

376 **[Reply]** Thank you for your insightful comments. We have tried our best to improve the  
377 analyses and we will address our reply as follows:

378

#### 379 **1) About the experimental design**

380 As we have stated in the manuscript, along the elevation, there forms a complex environmental  
381 gradient, homogeneous stands are hard to find in natural state (Körner, 2007) [Line 43-45].  
382 Such dilemma has also been faced in many previous studies exploring the elevational patterns  
383 (e.g., Zhu et al., 2010; Alves et al., 2010). Actually, ecological patterns and processes in the  
384 field are generally affected by complex biotic and abiotic factors. Researchers usually tried to  
385 find out the possible driving factors by conducting suitable statistical analyses, such as linear  
386 or nonlinear regression (Zhu et al., 2010), stepwise multiple regression (Zhang et al., 2009),  
387 generalized linear model (GLM) (Yang et al., 2008), partial GLM (Ma et al., 2018), or even  
388 more complex methods like structural equation modeling (Xu et al., 2018). And usually one or  
389 several of the abovementioned methods were adopted.

390

#### 391 **2) Improvements of the statistical analyses to explore possible driving factors**

392 The limited number of data prevented us from conducting more reasonable statistical analyses,  
393 however, we still made some efforts to explore the factors that have relatively stronger impacts  
394 on the elevational patterns of different C pools. Firstly, the effects of individual factor on  
395 different C components were explored using linear regressions. Then stepwise multiple  
396 regressions were further conducted to determine the relative strength and direction of the effects  
397 of multiple factors for the C storage of vegetation and woody debris (Paoli and Curran, 2007;  
398 Zhang et al., 2009). Prior to the stepwise regression, the variables were all normalized to make  
399 the regression coefficients comparable:

400

$$x' = \frac{x - \min(x)}{\max(x) - \min(x)}$$

401 Then, in the multiple linear model, the factor with relatively larger absolute regression  
402 coefficient may have stronger impacts on or be a better predictor of the variation of the C

403 storage of vegetation or woody debris [Line 214-240].

404

### 405 **3) Soil properties**

406 Information about the soil properties has been complemented based on laboratory  
407 determination (Table R2), and some further analyses have also been conducted. Herein, soil C  
408 storage was found to positively correlated with soil C concentration ( $R^2 = 0.45$ ,  $P < 0.001$ ), N  
409 concentration ( $R^2 = 0.49$ ,  $P < 0.001$ ) and bulk density ( $R^2 = 0.20$ ,  $P = 0.02$ ), while not related  
410 to moisture and C: N ratio ( $P > 0.05$ ). And these soil properties showed weak impacts on the  
411 vegetation C storage ( $P > 0.05$ ).

412 Unfortunately, we did not have the data of soil texture (such as silt content and clay  
413 content), but the soil types were almost the same for the plots (Editorial Board of the Scientific  
414 Survey of the Fanjingshan Mountain Preserve Guizhou Province, China, 1986). Besides,  
415 previous studies have shown that impacts of soil texture on productivity (thus biomass) might  
416 be related to moisture and nutrient availability (de Castilho et al., 2006). Thus, the possible  
417 effects of soil texture and other properties (e.g., pH) still remain to be explored in further studies  
418 [Line 352-355].

419

420 **Table R2** Soil properties of the beech forests on Mt. Fanjingshan

| Altitude (m) | Bulk density (g cm <sup>-3</sup> ) | Soil moisture | C concentration | N concentration | C: N ratio |
|--------------|------------------------------------|---------------|-----------------|-----------------|------------|
| 1095         | 0.48±0.1                           | 0.44±0.03     | 6.69±1.64       | 0.52±0.12       | 12.77±0.67 |
| 1136         | 0.78±0.22                          | 0.39±0.09     | 7.86±1.19       | 0.54±0.12       | 14.7±1.13  |
| 1221         | 0.37±0.1                           | 0.55±0.07     | 7.62±4.43       | 0.52±0.26       | 14.13±1.62 |
| 1401         | 0.37±0.06                          | 0.47±0.05     | 6.94±1.26       | 0.47±0.07       | 14.57±0.42 |
| 1500         | 0.6±0.24                           | 0.39±0.08     | 4.37±1.48       | 0.35±0.1        | 12.29±0.72 |
| 1580         | 0.55±0.14                          | 0.46±0.02     | 8.42±2.76       | 0.55±0.16       | 15.26±1    |
| 1735         | 0.39±0.17                          | 0.57±0.11     | 4.16±0.73       | 0.37±0.07       | 11.26±0.13 |
| 1843         | 0.61±0.13                          | 0.49±0.05     | 3.92±0.17       | 0.36±0.01       | 10.9±0.15  |
| 1930         | 0.52±0.12                          | 0.51±0.05     | 6.64±0.82       | 0.44±0.04       | 15.21±0.53 |

421

### 422 **4) Forest coverage and stem density**

423 Forest coverage was roughly estimated in each plot, and it showed no significant elevational  
424 patterns (Table 1). Stem density also had no obvious elevational patterns despite a large  
425 variation (1483 and 2350 stems ha<sup>-1</sup>) (Table 1). Both of them had little effects on the variation  
426 of the four C components, despite their significant impacts in previous studies (e.g., Hall et al.,  
427 2006). It has to be acknowledged that the estimation of coverage might have some errors, thus  
428 its impacts on the storage of different C pools still need further research.

429 And for stem density, stems with a DBH  $\geq 3$  cm were regarded as trees. In the plots,  
430 small trees usually accounted for a large proportion of the stems while their contribution to  
431 biomass were relatively small. Thus, we further discussed the contribution of large trees (DBH  
432  $\geq 30$  cm) to vegetation C storage (DeWalt and Chave, 2004; Xu et al., 2015). Large tree  
433 density showed positive relationships with elevation ( $R^2 = 0.67$ ,  $P < 0.01$ ; Table 2), and their  
434 contribution to biomass also increased at higher beech forests (Table 2) [Line 177-183]. Large  
435 tree density tended to increase in older beech forests ( $R^2 = 0.78$ ,  $P = 0.002$ ; Figure 5b) and  
436 contributed greatly to the increase of vegetation C storage. More detailed discussions about this

437 were added in the Discussion section [Line 282-288].

438

439 **Table 2.** Density of large trees (No. ha<sup>-1</sup>) (DBH ≥ 30cm) and their contributions to tree and vegetation  
440 carbon (C) storage in beech forests on Mt. Fanjingshan. TBA, total basal area.

| Elevation<br>(m) | Density<br>(No. ha <sup>-1</sup> ) | Percentage<br>of stems | Percentage<br>of TBA | Percentage<br>of tree C | Percentage of<br>vegetation C |
|------------------|------------------------------------|------------------------|----------------------|-------------------------|-------------------------------|
| 1095             | 33                                 | 1.4%                   | 15.3%                | 13.6%                   | 13.4%                         |
| 1136             | 83                                 | 3.9%                   | 19.7%                | 15.7%                   | 15.6%                         |
| 1221             | 150                                | 10.1%                  | 47.1%                | 46.9%                   | 46.6%                         |
| 1401             | 117                                | 6.4%                   | 48.8%                | 48.6%                   | 48.3%                         |
| 1500             | 283                                | 14.7%                  | 75.4%                | 79.0%                   | 77.1%                         |
| 1580             | 300                                | 18.0%                  | 84.6%                | 87.4%                   | 86.0%                         |
| 1735             | 283                                | 12.1%                  | 63.2%                | 62.7%                   | 61.0%                         |
| 1843             | 167                                | 8.2%                   | 65.5%                | 66.8%                   | 65.5%                         |
| 1930             | 250                                | 15.5%                  | 80.2%                | 84.8%                   | 83.9%                         |

441

442

443 **[Comment]** Results are not supported by statistical analysis. The changes in vegetation carbon  
444 storage along the elevation gradient makes no sense (Fig. 1). A simple visual inspection of Fig.  
445 1a for trees data, shows a regression line through two cluster of points and reporting significant  
446 coefficient of determination has no statistical meaning. The same occurred for the aboveground  
447 vegetation (Fig. 1b). Shrub and herb have no gradient (Fig. 1a): the regression line is almost  
448 horizontal. Similar comments can be made for Fig. 2. Litter and fine wood debris (FWD) have  
449 no gradient with elevation (Fig. 2a and b) whereas coarse woody debris (CWD) if has a gradient,  
450 it is not linear. In Fig. 2b, CWD shows only scattered points. Figure 4a shows no relationship  
451 between stand age and elevation: points are too scattered. Even Fig. 2b shows no real  
452 relationships between carbon storage of the different components and stand age. Many other  
453 comments could be made on the manuscript but I would point out only the main weaknesses.

454 **[Reply]** Thank you for your insightful comments. We will respond to your comments based on  
455 the following points.

456

#### 457 **1) Why we focused on the elevational patterns**

458 As abovementioned, the primary purpose of our study was to provide basic data of the beech  
459 forests on Mt. Fanjingshan, as there have been few reports about the C storage of beech forests  
460 in China, compared to other regions in the Northern Hemisphere (Mund, 2004; Poivesan et al.,  
461 2005; Takadi, 1969; Martin and Bailey, 1999; Jenkins et al., 2001). Mt. Fanjingshan is a place  
462 quite unique and ideal for studies of Chinese beech forests as it has the widest elevational range  
463 of Chinese beech forests at a local scale of any region. Such an elevation transect provides an  
464 excellent environmental gradient to explore how beech forests respond to varied environmental  
465 conditions at a local scale (Körner, 2007).

466

#### 467 **2) The reasonability of the statistical analyses**

468 Owing to the limited quantities of experimental data, the points might seem clustered or  
469 scattered, and the statistical analyses were relatively simple. However, we have tested the

470 normality (Shapiro-Wilk test) of the experimental data and the results showed that most of the  
 471 variables, excluding the C storage of soil (Figure R1), obeyed a normal distribution (Table R3).  
 472 Thus, we supposed the linear regression analyses were reasonable. And the judgements of the  
 473 elevational trends or the relationships between different variables were all based on the *P* value  
 474 of the statistical analyses. For example, the stand age tended to increase with increasing  
 475 elevation ( $R^2 = 0.56$ ,  $P = 0.02$ ; Figure 3a in the revised manuscript).

476  
 477

**Table R3** Normality test (Shapiro-Wilk) of the variables

| Components   | W Statistic  | df        | <i>P</i> value |
|--------------|--------------|-----------|----------------|
| Vegetation   | 0.883        | 9         | 0.170          |
| Tree         | 0.889        | 9         | 0.196          |
| Shrub        | 0.852        | 9         | 0.079          |
| Herb         | 0.853        | 9         | 0.081          |
| AGB          | 0.887        | 9         | 0.185          |
| BGB          | 0.897        | 9         | 0.234          |
| Litter       | 0.966        | 27        | 0.490          |
| Woody Debris | 0.841        | 9         | 0.060          |
| <b>Soil</b>  | <b>0.664</b> | <b>27</b> | <b>0.000</b>   |
| Ecosystem    | 0.918        | 9         | 0.372          |
| Stand age    | 0.901        | 9         | 0.258          |

478

Note: the data are supposed to obey normal distribution with  $P > 0.05$

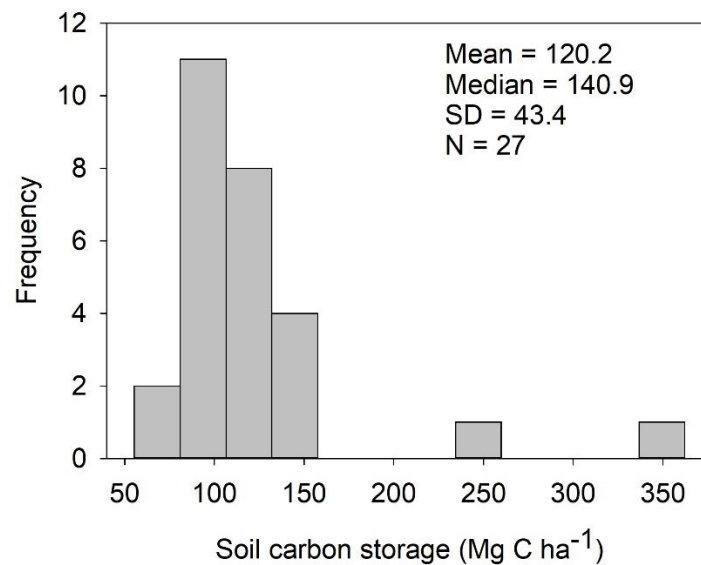

479  
 480  
 481

**Figure R1** Frequency distributions of soil carbon storage

482

**References**

- 483 Alves, L. F., Vieira, S. A., Scaranello, M. A., Camargo, P. B., Santos, F. A., Joly, C. A., and Martinelli, L.  
 484 A.: Forest structure and live aboveground biomass variation along an elevational gradient of tropical  
 485 Atlantic moist forest (Brazil), *Forest Ecol. Manag.*, 260, 679–691, 2010.
- 486 Bond-Lamberty, B., Wang, C., and Gower, S. T.: Annual carbon flux from woody debris for a boreal  
 487 black spruce fire chronosequence, *J. Geophys. Res-Atmos.*, 107, WFX-1, 2002.
- 488 Bradford, J. B., Birdsey, R. A., Joyce, L. A., and Ryan, M. G.: Tree age, disturbance history, and carbon  
 489 stocks and fluxes in subalpine Rocky Mountain forests, *Glob. Chang. Biol.*, 14, 2882–2897, 2008.
- 490 Bruelheide, H., Böhnke, M., Both, S., Fang, T., Assmann, T., Baruffol, M., ... and Bernhard, S.:  
 491 Community assembly during secondary forest succession in a Chinese subtropical forest, *Ecol.*  
 492 *Monogr*, 81, 25–41, 2011.
- 493 de Castilho, C. V., Magnusson, W. E., de Araújo, R. N. O., Luizao, R. C., Luizao, F. J., Lima, A. P., and  
 494 Higuchi, N.: Variation in aboveground tree live biomass in a central Amazonian Forest: Effects of soil  
 495 and topography, *Forest Ecol. Manag.*, 234, 85–96, 2006.
- 496 DeWalt, S. J., and Chave, J.: Structure and biomass of four lowland Neotropical forests, *Biotropica*, 36,  
 497 7–19, 2004.
- 498 Dixon, R. K., Brown, S., Houghton, R. A., Solomon, A. M., Trexler, M. C., and Wisniewski, J.: Carbon  
 499 pools and flux of global forest ecosystems, *Science*, 263, 185–190, 1994.
- 500 Dong, W. Y., Huang, B. L., Xie, Z. X., Xie, Z. H., and Liu, H. Y. Studies on the structure and dynamics  
 501 of biomass of *Qiongzhueta tumidinoda* clone Population, *Forest Research*, 15, 416–420, 2002[In  
 502 Chinese with English abstract].
- 503 Editorial Board of the Scientific Survey of the Fanjingshanshan Mountain Preserve, Guizhou Province,  
 504 China: Scientific Survey of the Fanjingshanshan Mountain Preserve Guizhou Province, China, China  
 505 Environmental Science Press, Beijing, China, 1986 [In Chinese].
- 506 Hall, S. A., Burke, I. C., and Hobbs, N. T.: Litter and dead wood dynamics in ponderosa pine forests  
 507 along a 160-year chronosequence, *Ecol. Appl.*, 16, 2344–2355, 2006.
- 508 Intergovernmental Panel on Climate Change (IPCC): 2006 IPCC Guidelines for National Greenhouse  
 509 Gas Inventories, vol. 4, Agriculture, Forestry and Other Land Use, edited by: Eggleston, H. S., Buendia,  
 510 L., Miwa, K., Ngara, T., and Tanabe, K., Inst. for Global Environ. Strategies, Hayama, Japan, 2006.
- 511 Jenkins, J. C., Birdsey, R. A., and Pan, Y.: Biomass and NPP estimation for the Mid-Atlantic region (USA)  
 512 using plot-level forest inventory data, *Ecol. Appl.*, 11, 1174–1193, 2001.
- 513 Körner, C.: The use of ‘elevation’ in ecological research, *Trends Ecol. Evol.*, 22, 569–74, 2007.
- 514 Ma, S. H., He, F., Tian, D., Zou, D. T., Yan, Z. B., Yang, Y. L., Zhou, T. C., Huang K. Y., Shen, H. H.,  
 515 and Fang, J. Y.: Variations and determinants of carbon content in plants: a global synthesis,  
 516 *Biogeosciences*, 15, 693, 2018.
- 517 Martin, C. W., and Bailey, A. S.: Twenty years of change in a northern hardwood forest, *Forest Ecol.*  
 518 *Manag.*, 123, 253–260, 1999.
- 519 McVicar, T. R. and Körner, C.: On the use of elevation, altitude, and height in the ecological and  
 520 climatological literature, *Oecologia*, 171, 335–337, 2013.
- 521 Mooney, H. A.: The carbon balance of plants, *Annu. Rev. Ecol. Syst.*, 3, 315–346, 1972.
- 522 Mund, M.: Carbon pools of European beech forests (*Fagus sylvatica*) under different silvicultural  
 523 management, Ph.D. thesis, The University of Göttingen, Germany, 256 pp., 2004.
- 524 Nalder, I. A. and Wein, R. W.: Long-term forest floor carbon dynamics after fire in upland boreal forests  
 525 of western Canada, *Glob. Biogeochem. Cy.*, 13, 951–968, 1999.

526 Nave, L. E., Vance, E. D., Swanston, C. W., and Curtis, P. S.: Harvest impacts on soil carbon storage in  
527 temperate forests, *Forest Ecol. Manag.*, 259, 857–866, 2010.

528 Paoli, G. D. and Curran, L. M.: Soil nutrients limit fine litter production and tree growth in mature  
529 lowland forest of southwestern Borneo, *Ecosystems*, 10, 503–518, 2007.

530 Paul, K. I., Polglase, P. J., Nyakuengama, J. G., Khanna, P. K.: Change in soil carbon following  
531 afforestation, *Forest Ecol. Manag.*, 168, 241–257, 2002.

532 Peichl, M. and Arain, M. A.: Above-and belowground ecosystem biomass and carbon pools in an age-  
533 sequence of temperate pine plantation forests, *Agr. Forest Meteorol.*, 140, 51–63, 2006.

534 Piovesan, G., Di Filippo, A., Alessandrini, A. E. A., Biondi, F., and Schirone, B.: Structure, dynamics  
535 and dendroecology of an old-growth *Fagus* forest in the Apennines, *J. Veg. Sci.*, 16, 13–28, 2005.

536 Spies, T. A., Franklin, J. F., and Thomas, T. B.: Coarse woody debris in Douglas-fir forests of western  
537 Oregon and Washington, *Ecology*, 69, 1689–1702, 1988.

538 Sturtevant, B. R., Bissonette, J. A., Long, J. N., and Roberts, D. W.: Coarse woody debris as a function  
539 of age, stand structure, and disturbance in boreal Newfoundland, *Ecol. Appl.*, 7, 702–712, 1997.

540 Tadaki, Y., Hatiya, K., and Tochiaki, K.: Studies on the Production Structure of Forest (XV), *J. Jpn. For.*  
541 *Soc.*, 51, 331–339, 1969[In Japanese with English abstract].

542 Tu, H. T., Sun, Y. J., Liu, S. Z., Yi, X. T., and Song, F. Establishment of the models on shrub biomass in  
543 Jiangle forest farm, Fujian, *Journal of Northwest Forestry University*, 30, 89–93, 2015[In Chinese with  
544 English abstract].

545 Xie, Z. Q., Wang, Y., Tang, Z. Y., and Xu, W. T. Handbook of biomass models of common shrubs in  
546 China, Science Press, Beijing, China, in press [in Chinese].

547 Xu, Y., Franklin, S. B., Wang, Q., Shi, Z., Luo, Y., Lu, Z., Zhang, J., Qiao, X., and Jiang, M.: Topographic  
548 and biotic factors determine forest biomass spatial distribution in a subtropical mountain moist forest,  
549 *Forest Ecol. Manag.*, 357, 95–103, 2015.

550 Xu, L., Shi, Y., Fang, H., Zhou, G., Xu, X., Zhou, Y., Tao, J., Ji, B., and Chen, L.: Vegetation carbon  
551 stocks driven by canopy density and forest age in subtropical forest ecosystems, *Sci. Total*  
552 *Environ.*, 631, 619–626, 2018.

553 Yang, Y. H., Fang, J. Y., Tang, Y. H., Ji, C. J., Zheng, C. Y., He, J. S., and Zhu, B.: Storage, patterns and  
554 controls of soil organic carbon in the Tibetan grassland, *Glob. Chang. Biol.*, 14, 1592–1599, 2008.

555 Zhang, X. P., Wang, M. B., and Liang, X. M.: Quantitative classification and carbon density of the forest  
556 vegetation in Lu'liang Mountains of China, *Plant Ecol.*, 201, 1–9, 2009.

557 Zhao, B. Biomass and Value of Ten Shrub Species in Dagang Mountai, Master thesis, Beijing Forestry  
558 University, China, 74pp., 2012 [In Chinese with English abstract].

559 Zhu, B., Wang, X. P., Fang, J. Y., Piao, S. L., Shen, H. H., Zhao, S. Q., and Peng, C. H.: Elevational  
560 changes in carbon storage of temperate forests on Mt Changbai, northeast China, *J. Plant Res.*, 123,  
561 439–452, 2010.

562 Zhu, J. X., Hu, H. F., Tao, S. L., Chi, X. L., Li, P., Jiang, L., Ji, C. J., Zhu, J. L., Tang, Z. Y., Pan, Y. D.,  
563 Birdsey, R. A., He, X. H., and Fang, J. Y.: Carbon stocks and changes of dead organic matter in China's  
564 forests, *Nat. Commun.*, 8, 1–10, 2017a.

565 Zhu, J. X., Zhou, X. L., Fang, W. J., Xiong, X. Y., Zhu, B., Ji, C., and Fang, J. Y.: Plant debris and its  
566 contribution to ecosystem carbon storage in successional *Larix gmelinii* forests in northeastern China,  
567 *Forests*, 8, 191, 2017b.

568
